# Supplementary material
Source: PubMed Central journal article supplement (PMC8934287)
Supplement: NIHMS1772820-supplement-Supplemental_material.pdf [file NIHMS1772820-supplement-Supplemental_material.pdf]

## Supplemental Figure legends

**Figure S1.** (a) Expression of hnRNP E1 transcript levels in NMuMG cells treated with TGF $\beta$ .  $\beta$ Actin was used as a loading control. (b) Polysome profiling of NMuMG cells either untreated or treated with TGF $\beta$  for 7 days. hnRNP E1 is actively translated under both conditions, whereas, the positive control inhibin  $\beta$ A shifts to heavier polysome fractions following TGF $\beta$  treatment. (c) Immunoblot of hnRNP E1 and Hsp90 (loading control) following treatment of NMuMG cells with cycloheximide for 12h and co-treatment with either the ER-Golgi trafficking inhibitor Brefeldin A, the lysosome inhibitor chloroquine or the proteasome inhibitor MG132. (d) Interaction between hnRNP E1 and ARIH1 in yeast 2 hybrid assay. Growth observed on Leu-/Trp-/Ade- plates indicating interaction between hnRNP E1 and ARIH1. (e) Immunoblot of hnRNP E1, ARIH1 and Hsp90 (loading control) following ARIH1 siRNA in NMuMG cells. (f) hnRNP E1 protein levels following treatment with the neddylation inhibitor MLN4924. (g) Immunoprecipitation of exogenous V5 tagged hnRNP E1 followed by K63 ubiquitin immunoblot. (h) Protein stability, assessed by cycloheximide chase assay, of WT and K314R or K351R mutant V5-tagged hnRNP E1 with or without MG132 treatment.

**Figure S2.** (a) Transcript levels of the epithelial marker, E-cadherin, in NMuMG cells treated with TGF $\beta$ , as determined by semi-quantitative PCR.  $\beta$ Actin was used as a loading control. (b) Rhodamine phalloidin staining of actin in NMuMG control and ARIH1 KD cells following 2 d of TGF $\beta$  treatment. (c) 3D invasion assay of NMuMG control and ARIH1 KD cells; representative images of invasion in Matrigel, invasive areas are delineated. (d) Immunoblot of ARIH1 expression levels in SUM159 control and ARIH1 ORF cells and SUM159 scrambled control and ARIH1 KD clones (sh5 and sh11). Hsp90 was used as a loading control. (e) Protein levels of hnRNP E1 in cycloheximide-treated SUM159 scrambled control and ARIH1 KD cells. Hsp90 is used as a loading control. (f) Proliferation of SUM159 WT, scrambled control and ARIH1 KD cells, as assessed by MTT assay. (g) Immunoblot of ARIH1 expression levels in LM2 scrambled control

(scram) and ARIH1 sh8 KD cells. Hsp90 was used as a loading control. **(h)** Proliferation rates of LM2 scrambled control and ARIH1 KD cells.

**Figure S3. (a)** Protein levels of hnRNP E1 and the mesenchymal markers N-Cadherin and Vimentin in TGF $\beta$ -treated SUM159 control and ARIH1 ORF cells. **(b)** 2D invasion assay of SUM159 control and ARIH1 ORF cells; representative images of invasive cells (left panel) and quantitation (Mean  $\pm$  SD, unpaired t-test compared to control; \* =  $P > 0.05$ ). **(c)** 3D invasion assay of SUM159 control and ARIH1 ORF cells; representative images of invasion in Matrigel. **(d)** Mammosphere assay of SUM159 control and ARIH1 ORF cells; representative images of spheres and quantitation of sphere number (Mean  $\pm$  SEM, paired t-test compared to control was not significant). **(e)** Image of excised tumors from mice injected with SUM159 cells stably expressing scrambled control. **(f)** Image of excised tumors from mice injected with SUM159 control and ARIH1 ORF cells. **(g)** Tumor volumes in NOD-SCID mice mammary fat pad injected with SUM159 control and ARIH1 ORF cells (mean  $\pm$  SEM). **(h)** Quantitation of tumor weight following xenograft of SUM159 control and ARIH1 ORF cells (n = 9 control xenografts, n = 7 ORF xenografts; mean + SEM, unpaired t-test; n.s = not significant).

**Figure S4. (a)** Protein levels of Vimentin and CD44 in LM2 scrambled control, ARIH1 Sh8 KD cells and ARIH1 sh8 KD with hnRNP E1 silencing (CRISPR 50 and 52). **(b)** Proliferation rates of LM2 scrambled control cells, ARIH1 sh8 KD cells and ARIH1 sh8 KD cells with hnRNP E1 silencing. **(c)** Representative image of excised tumors and **(d)** tumor weights from mice injected with LM2 ARIH1 sh8 E1 CRISPR 50 and 52. **(e)** Quantitation of 2D invasion, following crystal violet stain extraction, using LM2 ARIH1 KD cells and ARIH1 KD with hnRNP E1 silencing (mean +SD). **(f)** Representative images of 3D invasion assay with LM2 scrambled control cells and ARIH1 KD cells with hnRNP E1 silencing. **(g)** Protein levels of hnRNP E1 in SUM159 ARIH1 KD cells with hnRNP E1 CRISPR. **(h)** Proliferation rates of parental SUM159 ARIH1 KD cells and ARIH1 KD cells with hnRNP E1 CRISPR. **(i)** Representative

images of 3D invasion assay with SUM159 scrambled control cells, ARIH1 KD cells and ARIH1 KD cells with hnRNP E1 silencing. **(j)** Mammosphere formation in SUM159 scrambled control cells, ARIH1 KD cells and ARIH1 KD cells with hnRNP E1 silencing. V5 hnRNP E1 protein levels in **(k)** SUM159 ARIH1 ORF cells 3 d post transient nucleofection, and **(l)** stably selected SUM159 cells. V5 hnRNP E1 protein levels in stably selected SUM159 cells treated with cycloheximide for **(m)** 0, 4 and 8 h and for **(n)** 0 and 17 h. Hsp90 is used as a loading control. **(o)** V5 hnRNP E1 protein levels in stably selected SUM159 cells transiently transfected with control or ARIH1 siRNA for 72 h. **(p)** Proliferation of SUM159 cells stably expressing WT, K314R and K351R V5 hnRNP E1, as assessed by cell count. **(q)** Representative images and quantitation of mammosphere number (Mean  $\pm$  SEM, paired t-test compared to control; \*\* =  $P > 0.01$ , \*\*\* =  $P > 0.001$ ). **(r)** Representative images of 2D invasion assay using SUM159 cells stably expressing WT, K314R and K351R V5 hnRNP E1.

**Figure S5. (a)** Kaplan-Meier analysis of survival in TCGA breast cancer patient data. (n = 1194, TCGA dataset;  $P=0.05$ , log-rank test). **(b)** Kaplan-Meier analysis of relapse-free survival in breast cancer patients. (n = 3951, KM-plotter;  $P<0.001$ , log-rank test). Correlation between ARIH1 protein levels and the epithelial markers **(c)** E-cadherin and **(d)** Occuldin in breast cancer patient samples analyzed using cBioPortal. **(e)** Protein expression of ARIH1 in normal lung and lung adenocarcinoma tissue. **(f)** Protein expression of ARIH1 across lung cancer grade.

**Figure S6. (a)** Protein levels of hnRNP E1 and ARIH1 across a panel of colorectal cancer cell lines. Hsp90 was used as a loading control (top panel). hnRNP E1 transcript levels are not altered across these lines, as assessed by semi-quantitative PCR. GAPDH was used as a loading control (bottom panel). **(b)** Representative images of HCT116 scrambled control and ARIH1 KD cell morphology. **(c)** Proliferation of HCT116 scrambled control and ARIH1 KD cells, as assessed by cell count across 4 days. **(d)** 3D invasion assay of HCT116 WT, scrambled control and ARIH1 KD cells; representative images of invasion in Cultrex. **(e)** Correlation between ARIH1 protein

levels and the mesenchymal marker Vimentin (left panel) and the epithelial marker E-Cadherin (right panel) in colorectal cancer patient samples analyzed using cBioPortal.

**Table S1.** Sequences and expected product size of primers used for PCR.

**Table S2.** List of proteins identified from ARIH1-miniTurboID experiment.

**Table S3.** Sanger sequencing results for hnRNP E1 CRISPR clones.

# Supplemental Figure 1

**a**

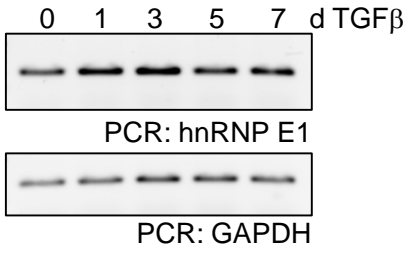

**b**

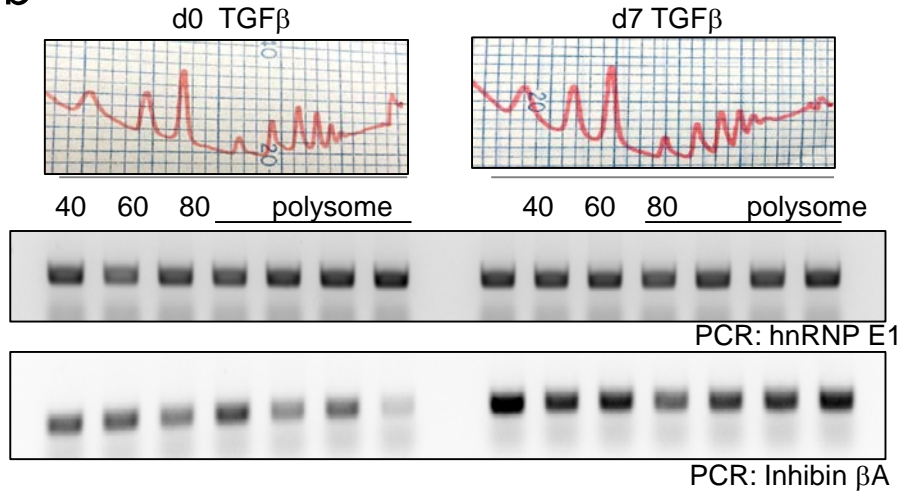

**c**

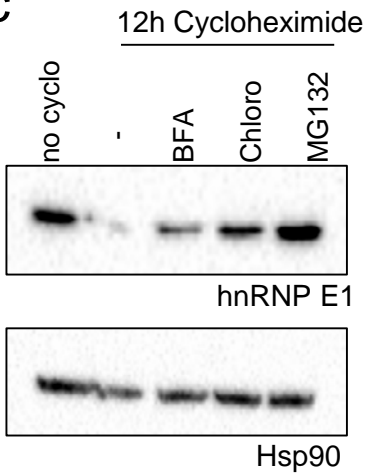

**d**

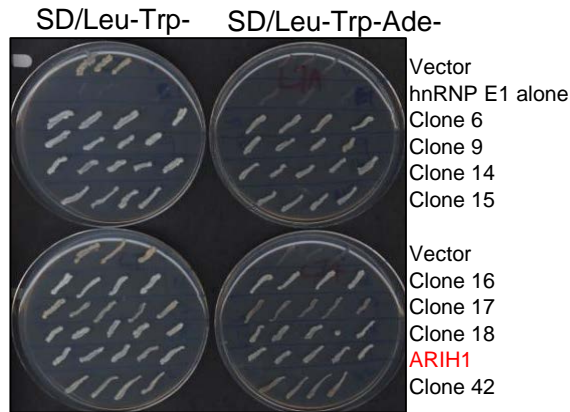

**e**

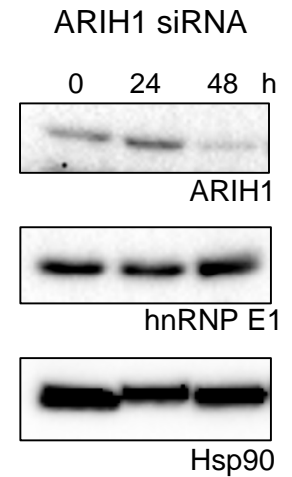

**f**

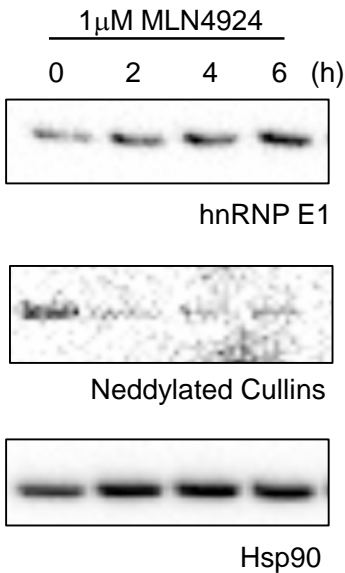

**g**

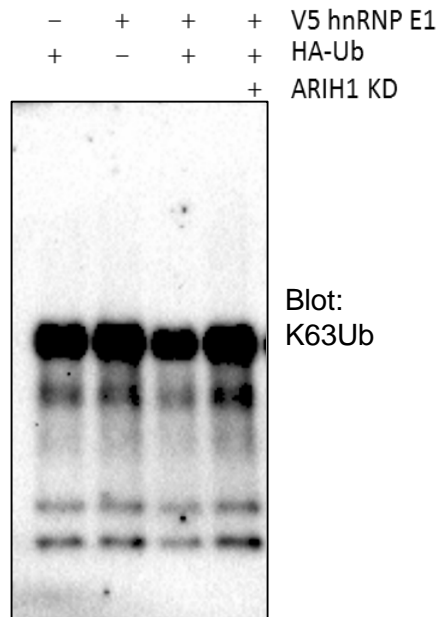

**h**

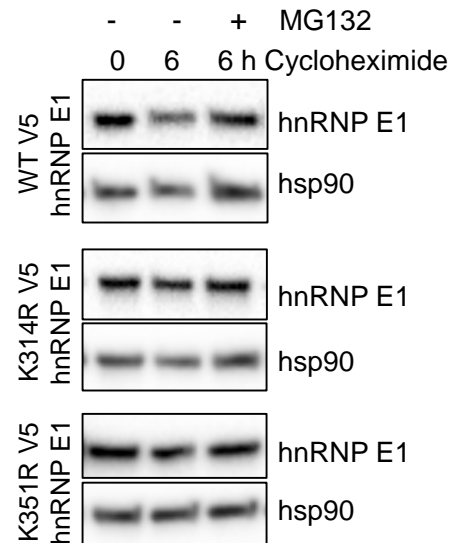

# Supplemental Figure 2

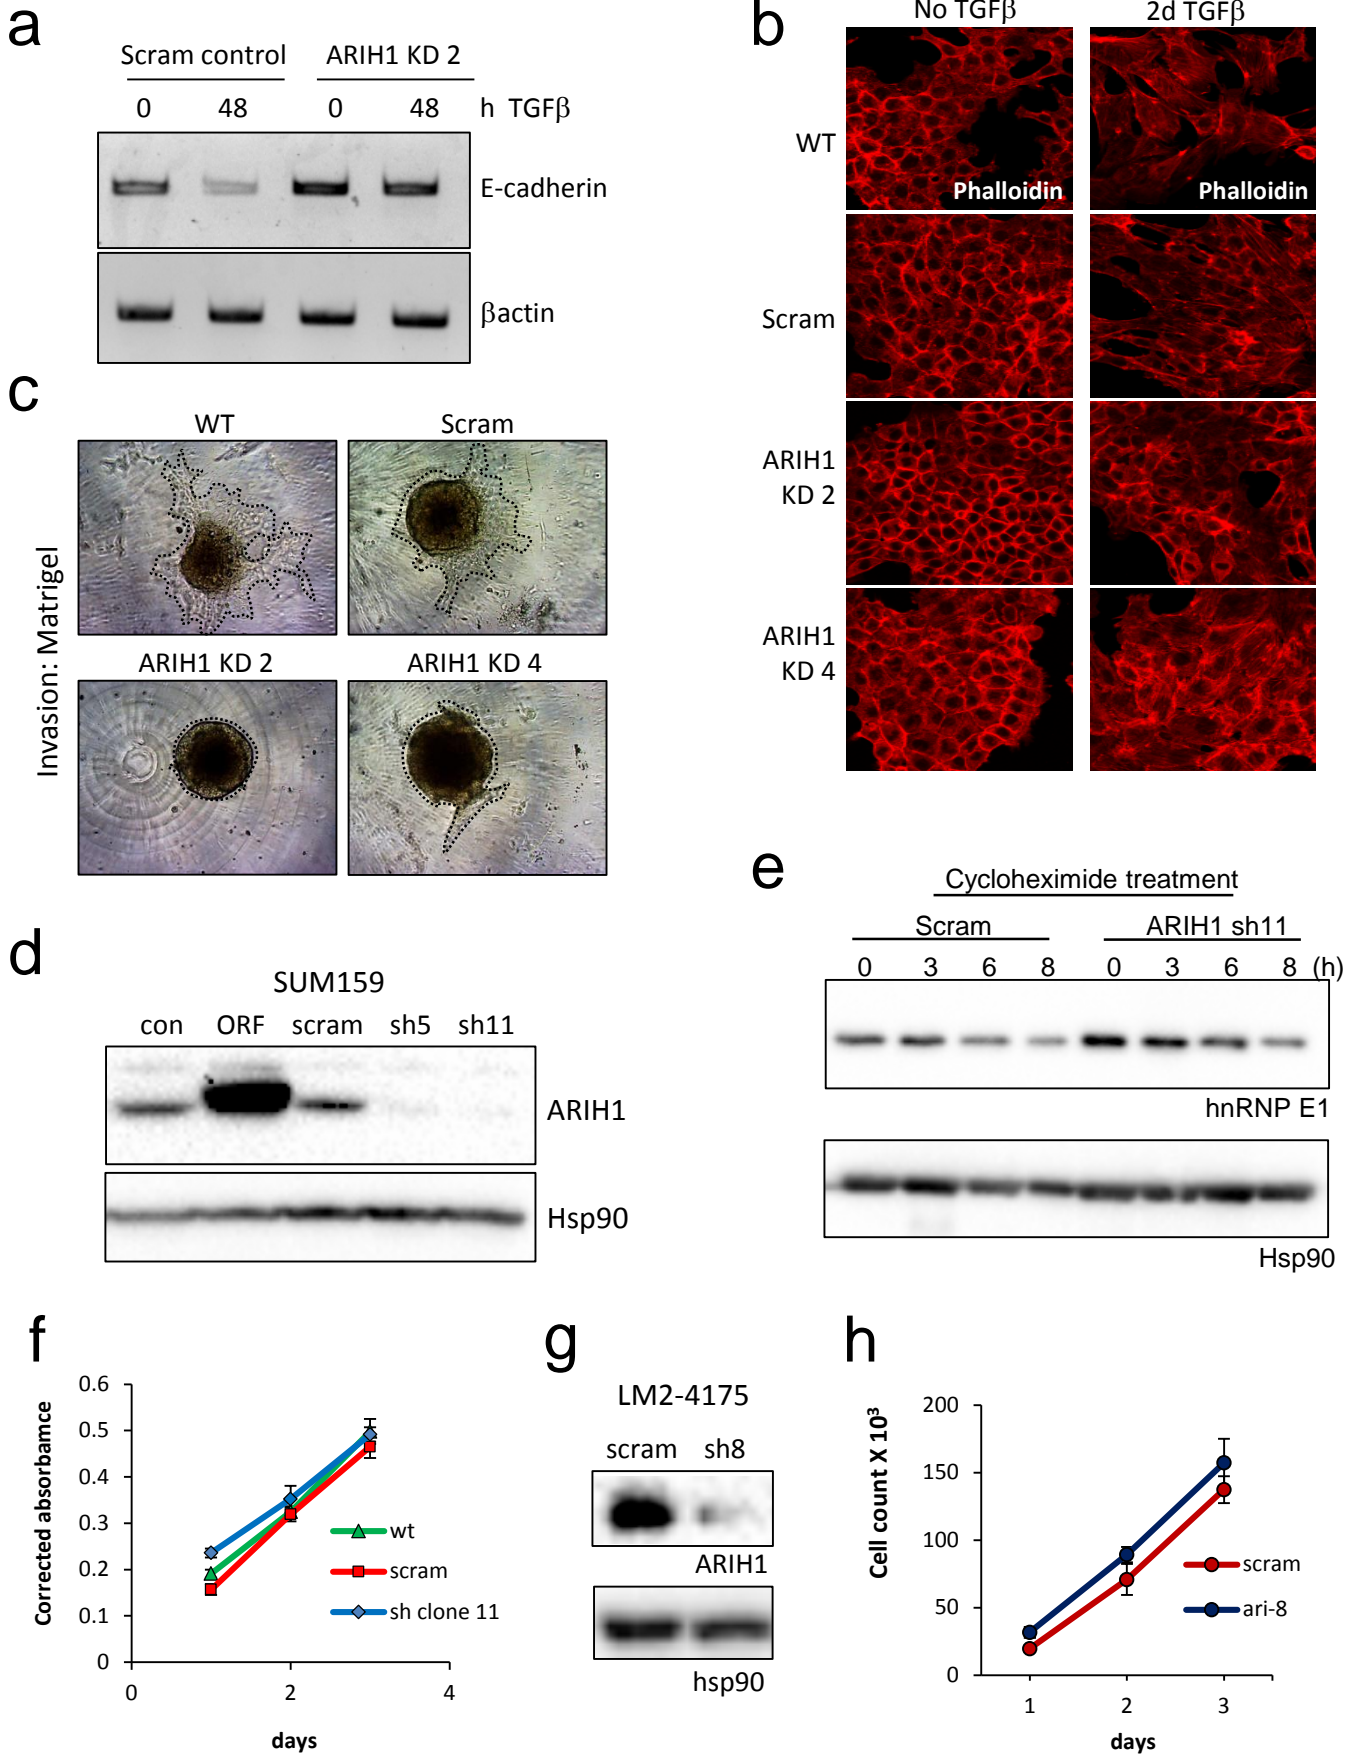

# Supplemental Figure 3

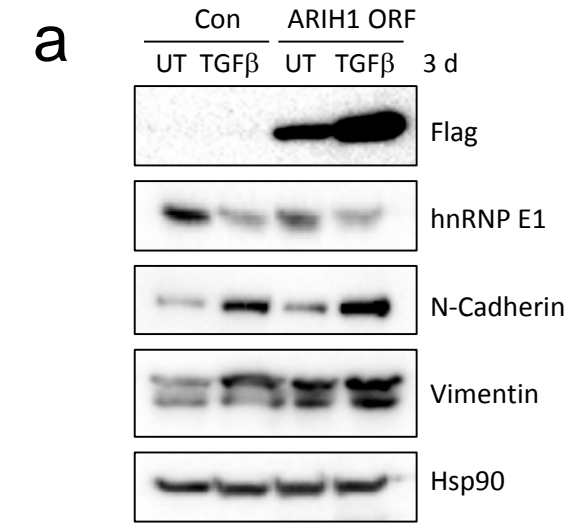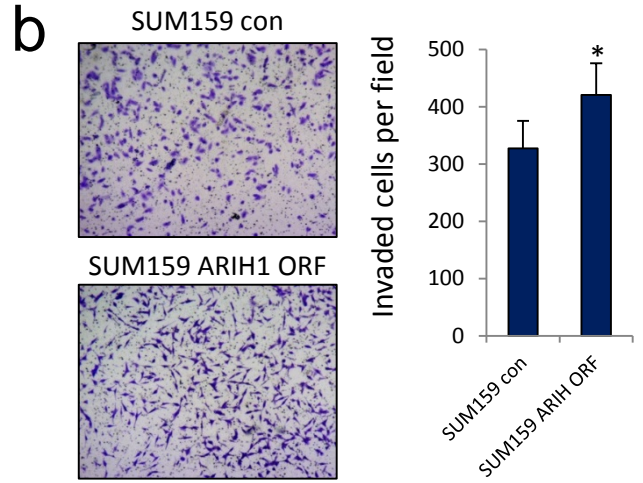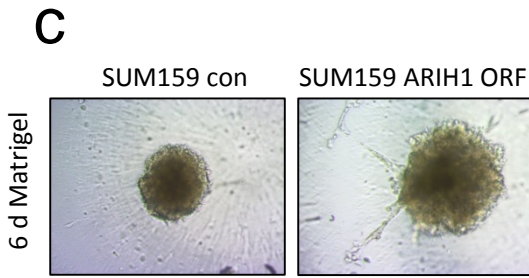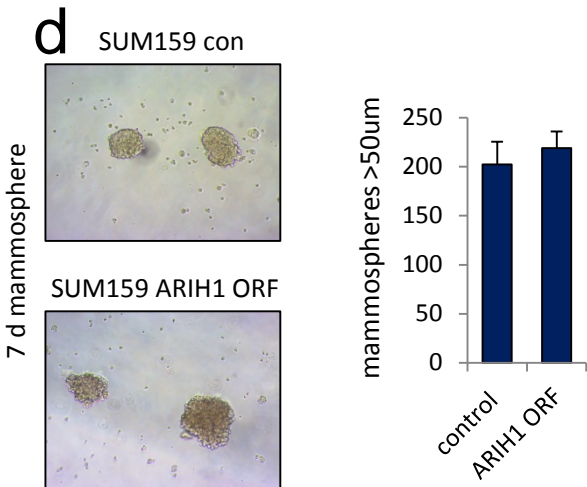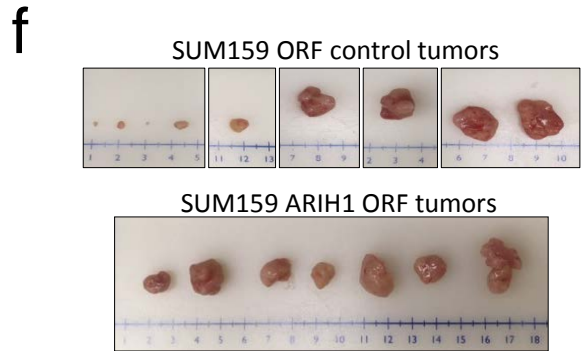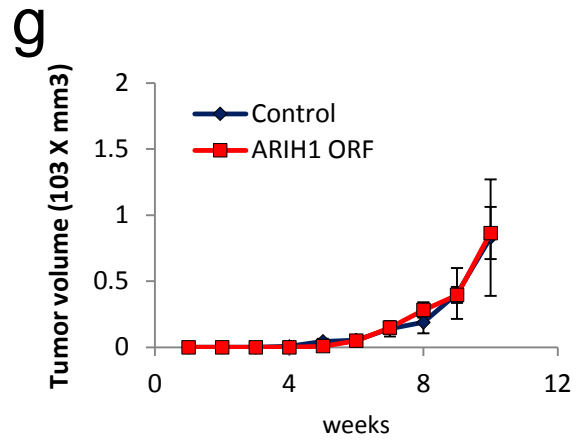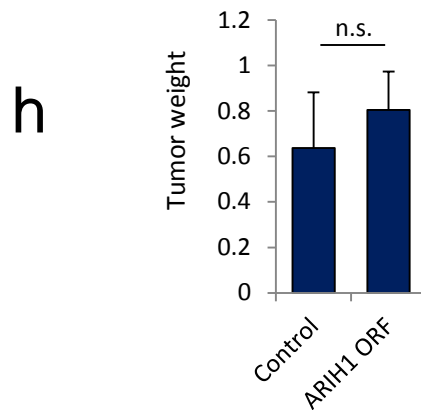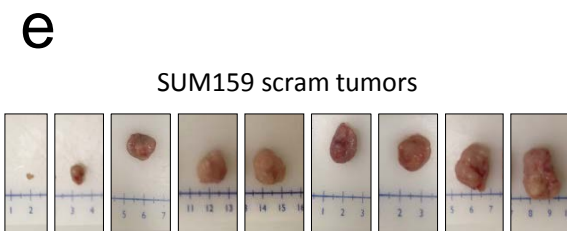



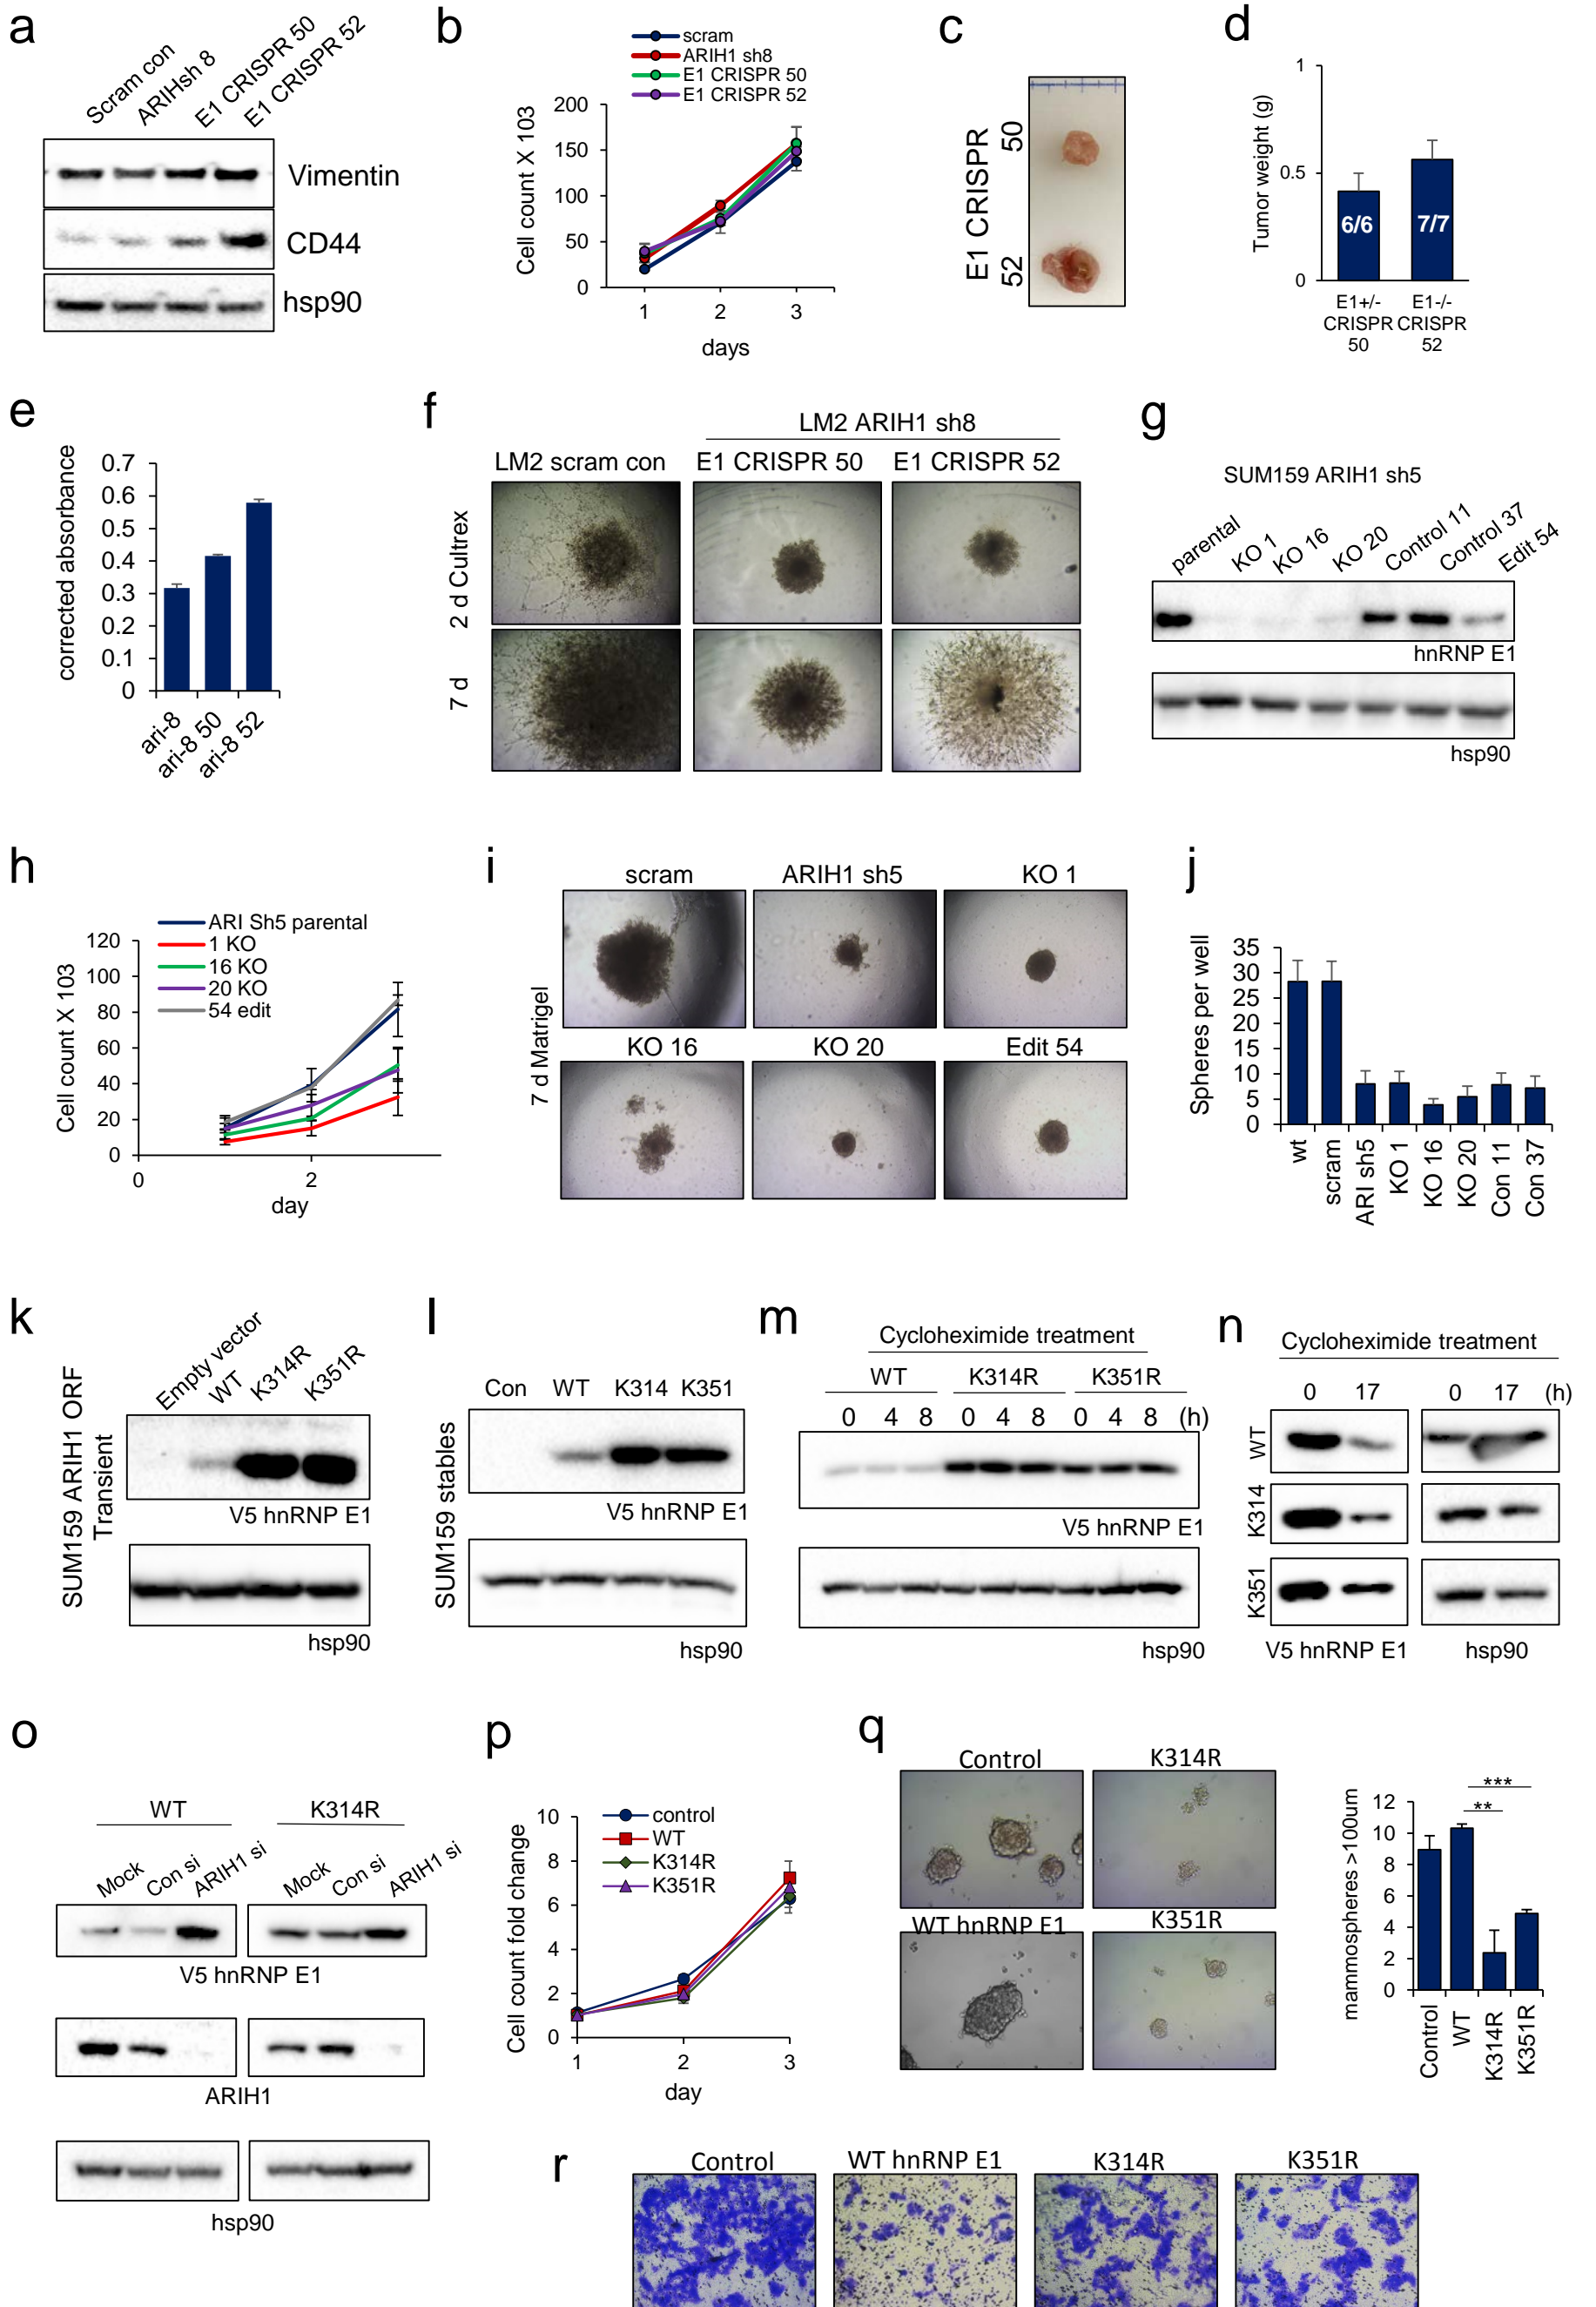



# Supplemental Figure 5

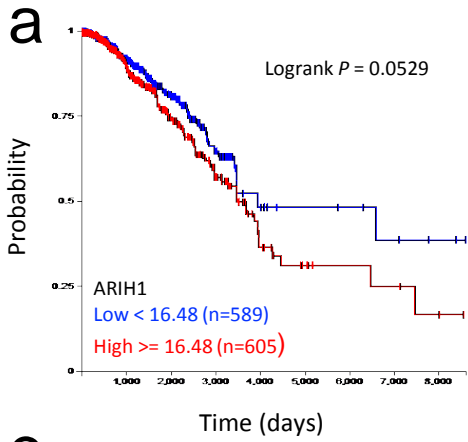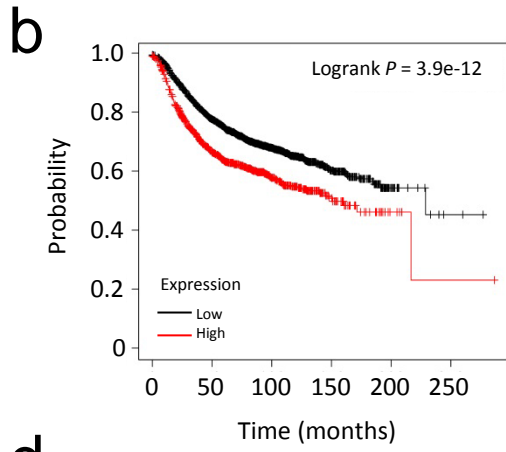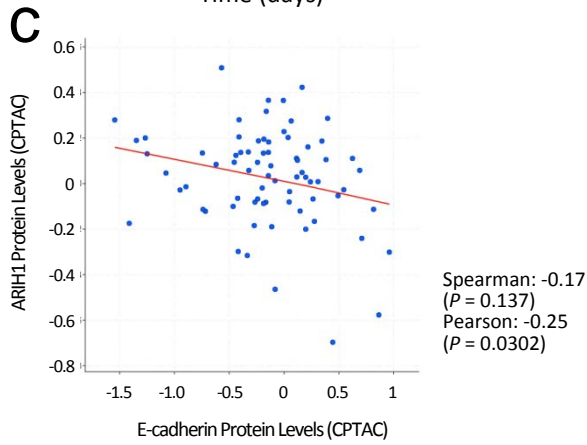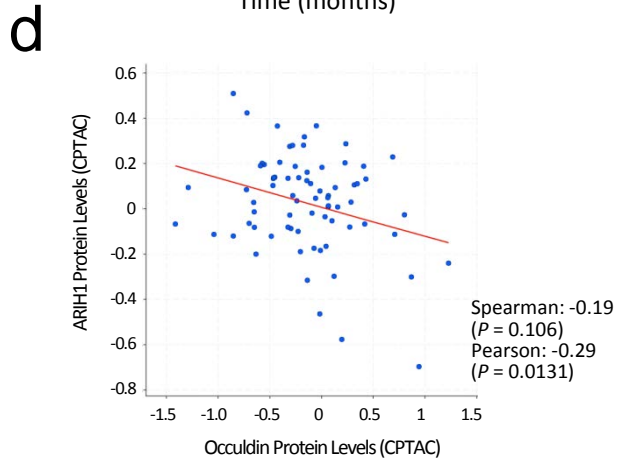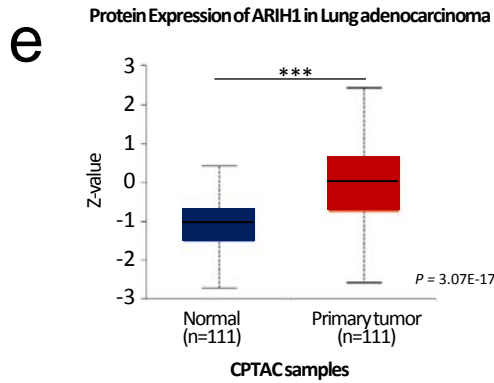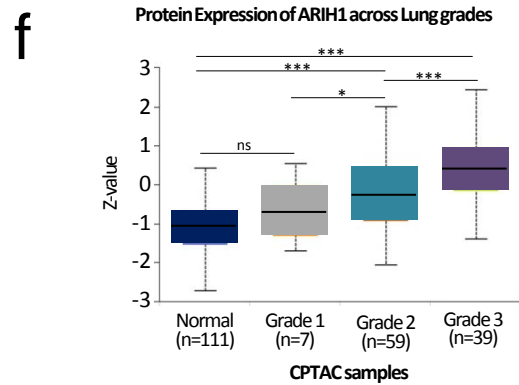

# Supplemental Figure 6

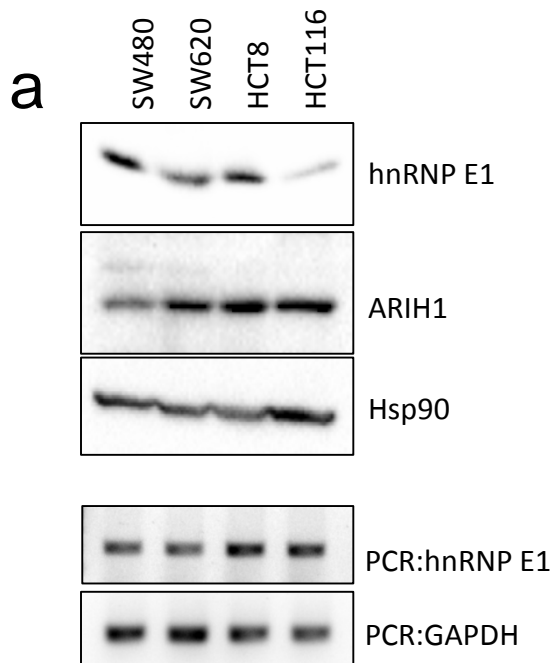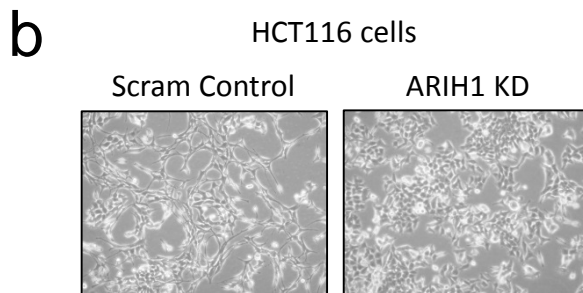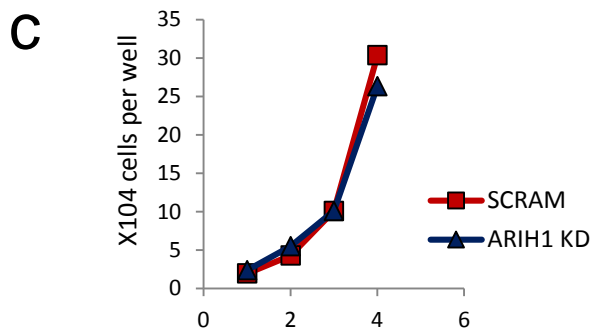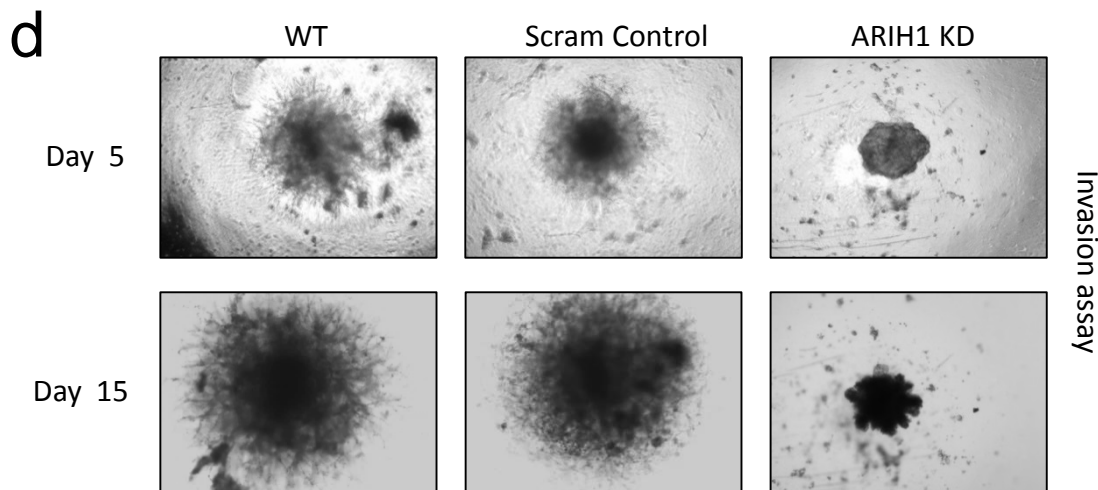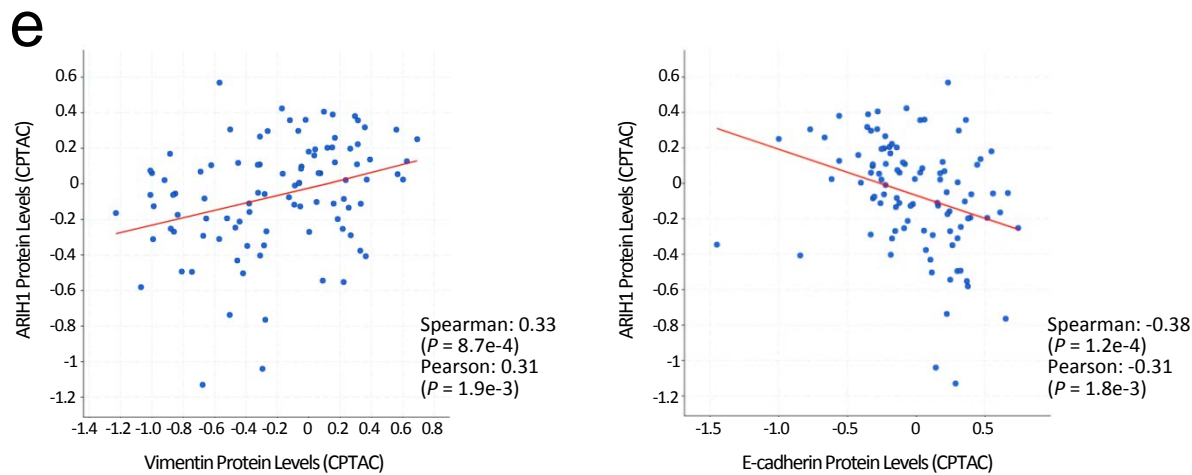

Table S1. Primers used for PCR

| Target                          | Sequence                                                                                     | Product size |
|---------------------------------|----------------------------------------------------------------------------------------------|--------------|
| Mouse hnRNP E1                  | Forward: AAGGCGCCAACATCAATGAG; Reverse: GGGTTACGAGCGAACCTACG                                 | 204 bp       |
| Mouse ARIH1                     | Forward:GAGGTCATCCAGAATCCAGCA ; Reverse:TGCGCAGGACACGAAATAGT                                 | 338 bp       |
| Mouse E-Cadherin                | Forward: GAAGGCTTGAGCACAACAGC; Reverse: AGATGGGGGCTTCATTACCG                                 | 400 bp       |
| Mouse Inhibin $\beta$ A         | Forward: TCCCCACCCAGGATCCGA; Reverse: ACCGGCTGGGTGACATCGGG                                   | 173 bp       |
| Mouse GAPDH                     | Forward: GGTTGTCTCCTGCGACTTCA; Reverse: TAGGGCTCTCTTGCTCAGT                                  | 220 bp       |
| Human hnRNP E1                  | Forward: CCACGTAACGAGCCCAACT; Reverse: CCCTCCGAGATGTTGATCCG                                  | 200 bp       |
| Human ARIH1                     | Forward: AGAGAATGCCACAGAGGTGC; Reverse: CCCTTCGTCGACTCTCACAG                                 | 119 bp       |
| Human Aldh1a1                   | Forward: ATCAAAGAAGCTGCCGGGAA; Reverse: GCATTGTCCAAGTCGGCATC                                 | 101 bp       |
| Human Klf4                      | Forward: ATGCTCACCCACCTTCTTC; Reverse: GGTGGTCCGACCTGGAAAAT                                  | 340 bp       |
| Human Oct4                      | Forward: CTCACCCTGGGGGTTCTATT; Reverse: CTGGTTCGCTTTCTCTTTTCG                                | 203 bp       |
| Human Sox2                      | Forward: AACCAGCGCATGGACAGTTA; Reverse: GACTTGACCACCGAACCCAT                                 | 278 bp       |
| Human Nanog                     | Forward: AAAGGCAACAACCCACTTC; Reverse: CATTGCTATTCTTCGGCCAG                                  | 274 bp       |
| Human GAPDH                     | Forward: TGATGACATCAAGAAGGTGGTGAAG; Reverse: TCCTTGAGGCCATGTGGGCCAT                          | 240 bp       |
| $\beta$ -Actin                  | Forward: TCATGAAGTGTGACGTTGACATCCGT; Reverse: CCTAGAAGCATTTCGGGTGCACGATG                     | 285 bp       |
| miniturboid ARIH1               | Forward: GGTGGTAAGCTTATGGACTCGGACGAGGGCTACA;<br>Reverse: TGCTTAGCGGCCGCGTCTCAATGTACTIONCCACA | 1.6 kb       |
| hnRNP E1 CRISPR primer set A    | Forward: ACTTGACCACGTAACGAGCC; Reverse: TCCAGCATGACCAGGCAAAT                                 | 554 bp       |
| hnRNP E1 CRISPR primer set B    | Forward: TCGGCTTCTTATGCACGGAA; Reverse: CTTCTCCAGCTTGTCGATGA                                 | 197 bp       |
| K351 site directed mut. primers | Forward: CCCCATGCCCTCTCAGAGGAAAGCCTGGC;<br>Reverse: GCCAGGCTTCTCTGAGAGGGGCATGGGG             | n/a          |
| K314 site directed mut. primers | Forward: CTGGGTTGGCAATTCTGATCTGGGCCCCG;<br>Reverse: CGGGGCCAGATCAGAATTGCCAACCCAG             | n/a          |

Table S2. Proteins identified from ARIH1-miniTurboID experiment

| reference              | Gene Symbol | Annotation                                                                              | Unique hits:<br>Hek_ARIH1<br>mTbioID_Con | Total hits:<br>Hek_ARIH1<br>mTbioID_Con | Unique hits:<br>Hek_ARIH1<br>mTbioID_Biotin | Total hits:<br>Hek_ARIH1<br>mTbioID_Biotin |
|------------------------|-------------|-----------------------------------------------------------------------------------------|------------------------------------------|-----------------------------------------|---------------------------------------------|--------------------------------------------|
| sp P21333 FLNA_HUMAN   | FLNA        | Filamin-A OS=Homo sapiens GN=FLNA PE=1 SV=4                                             | 0                                        | 0                                       | 51                                          | 56                                         |
| sp P49327 FASN_HUMAN   | FASN        | Fatty acid synthase OS=Homo sapiens GN=FASN PE=1 SV=3                                   | 0                                        | 0                                       | 21                                          | 21                                         |
| sp P50990 TCPQ_HUMAN   | CCT8        | T-complex protein 1 subunit theta OS=Homo sapiens GN=CCT8 PE=1 SV=4                     | 0                                        | 0                                       | 16                                          | 16                                         |
| sp Q04637 IF4G1_HUMAN  | EIF4G1      | Eukaryotic translation initiation factor 4 gamma 1 OS=Homo sapiens GN=EIF4G1 PE=1 SV=4  | 0                                        | 0                                       | 9                                           | 10                                         |
| sp P11388 TOP2A_HUMAN  | TOP2A       | DNA topoisomerase 2-alpha OS=Homo sapiens GN=TOP2A PE=1 SV=3                            | 0                                        | 0                                       | 7                                           | 7                                          |
| sp Q99613 EIF3C_HUMAN  | EIF3C       | Eukaryotic translation initiation factor 3 subunit C OS=Homo sapiens GN=EIF3C PE=1 SV=1 | 0                                        | 0                                       | 7                                           | 7                                          |
| sp Q6WCQ1 MPRIP_HUMAN  | MPRIP       | Myosin phosphatase Rho-interacting protein OS=Homo sapiens GN=MPRIP PE=1 SV=3           | 0                                        | 0                                       | 7                                           | 7                                          |
| sp P46060 RAGP1_HUMAN  | RANGAP1     | Ran GTPase-activating protein 1 OS=Homo sapiens GN=RANGAP1 PE=1 SV=1                    | 0                                        | 0                                       | 7                                           | 7                                          |
| sp Q09666 AHNAK_HUMAN  | AHNAK       | Neuroblast differentiation-associated protein AHNAK OS=Homo sapiens GN=AHNAK PE=1 SV=2  | 0                                        | 0                                       | 7                                           | 7                                          |
| sp P27816 MAP4_HUMAN   | MAP4        | Microtubule-associated protein 4 OS=Homo sapiens GN=MAP4 PE=1 SV=3                      | 0                                        | 0                                       | 7                                           | 7                                          |
| sp P37802 TAGLN2_HUMAN | TAGLN2      | Transgelin-2 OS=Homo sapiens GN=TAGLN2 PE=1 SV=3                                        | 0                                        | 0                                       | 6                                           | 7                                          |
| sp P52907 CAZA1_HUMAN  | CAPZA1      | F-actin-capping protein subunit alpha-1 OS=Homo sapiens GN=CAPZA1 PE=1 SV=3             | 0                                        | 0                                       | 5                                           | 6                                          |
| sp Q9UM54 MYO6_HUMAN   | MYO6        | Unconventional myosin-VI OS=Homo sapiens GN=MYO6 PE=1 SV=4                              | 0                                        | 0                                       | 5                                           | 5                                          |
| sp Q86VP6 CAND1_HUMAN  | CAND1       | Cullin-associated NEDD8-dissociated protein 1 OS=Homo sapiens GN=CAND1 PE=1 SV=2        | 0                                        | 0                                       | 5                                           | 5                                          |
| sp Q9Y4X5 ARI1_HUMAN   | ARIH1       | E3 ubiquitin-protein ligase ARIH1 OS=Homo sapiens GN=ARIH1 PE=1 SV=2                    | 0                                        | 0                                       | 4                                           | 4                                          |
| sp Q14152 EIF3A_HUMAN  | EIF3A       | Eukaryotic translation initiation factor 3 subunit A OS=Homo sapiens GN=EIF3A PE=1 SV=1 | 0                                        | 0                                       | 4                                           | 4                                          |
| sp Q6Y7W6 GGYF2_HUMAN  | GIGYF2      | GRB10-interacting GYF protein 2 OS=Homo sapiens GN=GIGYF2 PE=1 SV=1                     | 0                                        | 0                                       | 4                                           | 4                                          |
| sp P40227 TCPZ_HUMAN   | CCT6A       | T-complex protein 1 subunit zeta OS=Homo sapiens GN=CCT6A PE=1 SV=3                     | 0                                        | 0                                       | 4                                           | 4                                          |
| sp Q9Y5K6 CD2AP_HUMAN  | CD2AP       | CD2-associated protein OS=Homo sapiens GN=CD2AP PE=1 SV=1                               | 0                                        | 0                                       | 4                                           | 4                                          |
| sp O75367 H2AFY_HUMAN  | H2AFY       | Core histone macro-H2A.1 OS=Homo sapiens GN=H2AFY PE=1 SV=4                             | 0                                        | 0                                       | 4                                           | 4                                          |
| sp P49368 TCPG_HUMAN   | CCT3        | T-complex protein 1 subunit gamma OS=Homo sapiens GN=CCT3 PE=1 SV=4                     | 0                                        | 0                                       | 4                                           | 4                                          |
| sp Q00341 VIGLN_HUMAN  | HDLBP       | Vigilin OS=Homo sapiens GN=HDLBP PE=1 SV=2                                              | 0                                        | 0                                       | 3                                           | 3                                          |
| sp Q9Y490 TLN1_HUMAN   | TLN1        | Talin-1 OS=Homo sapiens GN=TLN1 PE=1 SV=3                                               | 0                                        | 0                                       | 3                                           | 3                                          |
| sp Q9P0K7 RAI14_HUMAN  | RAI14       | Ankycorbin OS=Homo sapiens GN=RAI14 PE=1 SV=2                                           | 0                                        | 0                                       | 3                                           | 3                                          |
| sp O75821 EIF3G_HUMAN  | EIF3G       | Eukaryotic translation initiation factor 3 subunit G OS=Homo sapiens GN=EIF3G PE=1 SV=2 | 0                                        | 0                                       | 3                                           | 3                                          |
| sp P49411 EFTU_HUMAN   | TUFM        | Elongation factor Tu, mitochondrial OS=Homo sapiens GN=TUFM PE=1 SV=2                   | 0                                        | 0                                       | 3                                           | 3                                          |
| sp Q92900 RENT1_HUMAN  | UPF1        | Regulator of nonsense transcripts 1 OS=Homo sapiens GN=UPF1 PE=1 SV=2                   | 0                                        | 0                                       | 3                                           | 3                                          |
| sp Q58FF7 H90B3_HUMAN  | HSP90AB3P   | Putative heat shock protein HSP 90-beta-3 OS=Homo sapiens GN=HSP90AB3P PE=5 SV=1        | 0                                        | 0                                       | 3                                           | 3                                          |
| sp Q16512 PKN1_HUMAN   | PKN1        | Serine/threonine-protein kinase N1 OS=Homo sapiens GN=PKN1 PE=1 SV=2                    | 0                                        | 0                                       | 3                                           | 3                                          |
| sp P49959 MRE11_HUMAN  | MRE11       | Double-strand break repair protein MRE11 OS=Homo sapiens GN=MRE11 PE=1 SV=3             | 0                                        | 0                                       | 3                                           | 3                                          |
| sp Q15365 PCBP1_HUMAN  | PCBP1       | Poly(rC)-binding protein 1 OS=Homo sapiens GN=PCBP1 PE=1 SV=2                           | 0                                        | 0                                       | 2                                           | 3                                          |
| sp P52597 HNRPF_HUMAN  | HNRNPF      | Heterogeneous nuclear ribonucleoprotein F OS=Homo sapiens GN=HNRNPF PE=1 SV=3           | 0                                        | 0                                       | 2                                           | 3                                          |
| sp Q14157 UBP2L_HUMAN  | UBAP2L      | Ubiquitin-associated protein 2-like OS=Homo sapiens GN=UBAP2L PE=1 SV=2                 | 0                                        | 0                                       | 2                                           | 2                                          |
| sp P50914 RL14_HUMAN   | RPL14       | 60S ribosomal protein L14 OS=Homo sapiens GN=RPL14 PE=1 SV=4                            | 0                                        | 0                                       | 2                                           | 2                                          |
| sp O00303 EIF3F_HUMAN  | EIF3F       | Eukaryotic translation initiation factor 3 subunit F OS=Homo sapiens GN=EIF3F PE=1 SV=1 | 0                                        | 0                                       | 2                                           | 2                                          |
| sp P07814 SYEP_HUMAN   | EPRS        | Bifunctional glutamate/proline--tRNA ligase OS=Homo sapiens GN=EPRS PE=1 SV=5           | 0                                        | 0                                       | 2                                           | 2                                          |
| sp Q13765 NACA_HUMAN   | NACA        | Nascent polypeptide-associated complex subunit alpha OS=Homo sapiens GN=NACA PE=1 SV=1  | 0                                        | 0                                       | 2                                           | 2                                          |
| sp Q14247 SRC8_HUMAN   | CTTN        | Src substrate cortactin OS=Homo sapiens GN=CTTN PE=1 SV=2                               | 0                                        | 0                                       | 2                                           | 2                                          |
| sp Q15393 SF3B3_HUMAN  | SF3B3       | Splicing factor 3B subunit 3 OS=Homo sapiens GN=SF3B3 PE=1 SV=4                         | 0                                        | 0                                       | 2                                           | 2                                          |
| sp P60866 RS20_HUMAN   | RPS20       | 40S ribosomal protein S20 OS=Homo sapiens GN=RPS20 PE=1 SV=1                            | 0                                        | 0                                       | 2                                           | 2                                          |
| sp P31943 HNRH1_HUMAN  | HNRNPH1     | Heterogeneous nuclear ribonucleoprotein H OS=Homo sapiens GN=HNRNPH1 PE=1 SV=4          | 0                                        | 0                                       | 2                                           | 2                                          |
| sp P17661 DESM_HUMAN   | DES         | Desmin OS=Homo sapiens GN=DES PE=1 SV=3                                                 | 0                                        | 0                                       | 2                                           | 2                                          |
| sp P78527 PRKDC_HUMAN  | PRKDC       | DNA-dependent protein kinase catalytic subunit OS=Homo sapiens GN=PRKDC PE=1 SV=3       | 0                                        | 0                                       | 2                                           | 2                                          |
| sp P14868 SYDC_HUMAN   | DARS        | Aspartate--tRNA ligase, cytoplasmic OS=Homo sapiens GN=DARS PE=1 SV=2                   | 0                                        | 0                                       | 2                                           | 2                                          |
| sp P57737 CORO7_HUMAN  | CORO7       | Coronin-7 OS=Homo sapiens GN=CORO7 PE=1 SV=2                                            | 0                                        | 0                                       | 2                                           | 2                                          |
| sp P63173 RL38_HUMAN   | RPL38       | 60S ribosomal protein L38 OS=Homo sapiens GN=RPL38 PE=1 SV=2                            | 0                                        | 0                                       | 2                                           | 2                                          |
| sp P13010 XRCC5_HUMAN  | XRCC5       | X-ray repair cross-complementing protein 5 OS=Homo sapiens GN=XRCC5 PE=1 SV=3           | 0                                        | 0                                       | 2                                           | 2                                          |
| sp P63244 RACK1_HUMAN  | RACK1       | Receptor of activated protein C kinase 1 OS=Homo sapiens GN=RACK1 PE=1 SV=3             | 0                                        | 0                                       | 2                                           | 2                                          |
| sp Q15019 SEPT2_HUMAN  | SEPT2       | Septin-2 OS=Homo sapiens GN=SEPT2 PE=1 SV=1                                             | 0                                        | 0                                       | 2                                           | 2                                          |
| sp Q16555 DPYL2_HUMAN  | DPYSL2      | Dihydropyrimidinase-related protein 2 OS=Homo sapiens GN=DPYSL2 PE=1 SV=1               | 0                                        | 0                                       | 2                                           | 2                                          |
| sp P50991 TCPD_HUMAN   | CCT4        | T-complex protein 1 subunit delta OS=Homo sapiens GN=CCT4 PE=1 SV=4                     | 0                                        | 0                                       | 2                                           | 2                                          |
| sp O95347 SMC2_HUMAN   | SMC2        | Structural maintenance of chromosomes protein 2 OS=Homo sapiens GN=SMC2 PE=1 SV=2       | 0                                        | 0                                       | 2                                           | 2                                          |
| sp P78344 IF4G2_HUMAN  | EIF4G2      | Eukaryotic translation initiation factor 4 gamma 2 OS=Homo sapiens GN=EIF4G2 PE=1 SV=1  | 0                                        | 0                                       | 2                                           | 2                                          |
| sp Q9NQC7 CYLD_HUMAN   | CYLD        | Ubiquitin carboxyl-terminal hydrolase CYLD OS=Homo sapiens GN=CYLD PE=1 SV=1            | 0                                        | 0                                       | 2                                           | 2                                          |
| sp A6NNT2 CP096_HUMAN  | C16orf96    | Uncharacterized protein C16orf96 OS=Homo sapiens GN=C16orf96 PE=4 SV=3                  | 0                                        | 0                                       | 2                                           | 2                                          |
| sp Q07157 ZO1_HUMAN    | TJP1        | Tight junction protein ZO-1 OS=Homo sapiens GN=TJP1 PE=1 SV=3                           | 0                                        | 0                                       | 2                                           | 2                                          |
| sp P33176 KINH_HUMAN   | KIF5B       | Kinesin-1 heavy chain OS=Homo sapiens GN=KIF5B PE=1 SV=1                                | 0                                        | 0                                       | 2                                           | 2                                          |
| sp P62851 RS25_HUMAN   | RPS25       | 40S ribosomal protein S25 OS=Homo sapiens GN=RPS25 PE=1 SV=1                            | 0                                        | 0                                       | 2                                           | 2                                          |
| sp P11021 GRP78_HUMAN  | HSPA5       | 78 kDa glucose-regulated protein OS=Homo sapiens GN=HSPA5 PE=1 SV=2                     | 1                                        | 1                                       | 5                                           | 5                                          |
| sp P17987 TCPA_HUMAN   | TCP1        | T-complex protein 1 subunit alpha OS=Homo sapiens GN=TCP1 PE=1 SV=1                     | 1                                        | 1                                       | 5                                           | 5                                          |
| sp P62701 RS4X_HUMAN   | RPS4X       | 40S ribosomal protein S4, X isoform OS=Homo sapiens GN=RPS4X PE=1 SV=2                  | 1                                        | 1                                       | 4                                           | 5                                          |
| sp P54652 HSP72_HUMAN  | HSPA2       | Heat shock-related 70 kDa protein 2 OS=Homo sapiens GN=HSPA2 PE=1 SV=1                  | 1                                        | 1                                       | 4                                           | 4                                          |
| sp Q14240 IF4A2_HUMAN  | EIF4A2      | Eukaryotic translation initiation factor 4A-II OS=Homo sapiens GN=EIF4A2 PE=1 SV=2      | 1                                        | 1                                       | 4                                           | 4                                          |
| sp O94832 MYO1D_HUMAN  | MYO1D       | Unconventional myosin-Id OS=Homo sapiens GN=MYO1D PE=1 SV=2                             | 1                                        | 1                                       | 4                                           | 4                                          |
| sp P13639 EF2_HUMAN    | EEF2        | Elongation factor 2 OS=Homo sapiens GN=EEF2 PE=1 SV=4                                   | 1                                        | 1                                       | 3                                           | 4                                          |
| sp P16403 H12_HUMAN    | HIST1H1C    | Histone H1.2 OS=Homo sapiens GN=HIST1H1C PE=1 SV=2                                      | 1                                        | 1                                       | 3                                           | 3                                          |
| sp P06576 ATPB_HUMAN   | ATP5B       | ATP synthase subunit beta, mitochondrial OS=Homo sapiens GN=ATP5B PE=1 SV=3             | 1                                        | 1                                       | 3                                           | 3                                          |
| sp P26373 RL13_HUMAN   | RPL13       | 60S ribosomal protein L13 OS=Homo sapiens GN=RPL13 PE=1 SV=4                            | 2                                        | 2                                       | 6                                           | 6                                          |
| sp P17844 DDX5_HUMAN   | DDX5        | Probable ATP-dependent RNA helicase DDX5 OS=Homo sapiens GN=DDX5 PE=1 SV=1              | 2                                        | 2                                       | 4                                           | 5                                          |
| sp P34931 HS71L_HUMAN  | HSPA1L      | Heat shock 70 kDa protein 1-like OS=Homo sapiens GN=HSPA1L PE=1 SV=2                    | 3                                        | 3                                       | 9                                           | 10                                         |
| sp P0DMV9 HS71B_HUMAN  | HSPA1B      | Heat shock 70 kDa protein 1B OS=Homo sapiens GN=HSPA1B PE=1 SV=1                        | 3                                        | 3                                       | 8                                           | 8                                          |
| sp P19338 NUCL_HUMAN   | NCL         | Nucleolin OS=Homo sapiens GN=NCL PE=1 SV=3                                              | 3                                        | 3                                       | 7                                           | 7                                          |
| sp P09874 PARP1_HUMAN  | PARP1       | Poly [ADP-ribose] polymerase 1 OS=Homo sapiens GN=PARP1 PE=1 SV=4                       | 4                                        | 4                                       | 13                                          | 13                                         |
| sp P52272 HNRPM_HUMAN  | HNRNPM      | Heterogeneous nuclear ribonucleoprotein M OS=Homo sapiens GN=HNRNPM PE=1 SV=3           | 4                                        | 4                                       | 10                                          | 10                                         |

Table S3. Sanger sequencing of hnRNP E1 CRISPR clones

| Legend: Guide RNA, Ref = ARIH1 KD parental sequencing results.         |                                                                                                      |
|------------------------------------------------------------------------|------------------------------------------------------------------------------------------------------|
| <b>LM2-4175 ARIH1 sh8 hnRNP E1 CRISPR clone 50 product (550 bp)</b>    |                                                                                                      |
| Ref                                                                    | TCGCGGATCTCTTTGATCTTACACCCGCCTTTCCCAATCAGGGAGCCGCACTGGGTGGCCGGCACCACCAGCCTCAGGGTGACCGGGGGCCTGCTGGCCG |
| Seq 1                                                                  | TCGCGGATCTCTTTGATCTTACACCCGCCTTTCCCAATCAGGGAGCCGCACTGGGTGGCCGGCACCACCAGCCTCAGGGTGACCGGGGGCCTGCTGGCCG |
| Seq 2                                                                  | TCGCGGATCTCTTTGATCTTACACCCGCCTTTCCCAATCAGGGAGCCGCACTGGGTGGCCGGCACCACCAGCCTCAGGGTGACCGGGGGCCTGCTGGCCG |
| Ref                                                                    | CGGTACTGTTGGTCATGGAGCTGTTGATATCTTCCTCCAGCTTGTGATGATCATAGCGAAAGCCTTAAAGATGGCATTGGTGGGGCCGGTCAGAGTGAT  |
| Seq 1                                                                  | CGGTACTGTTGGTCATGGAGCTGTTGATATCTTCCTCCAGCTTGTGATGATCATAGCGAAAGCCTTAAAGATGGCATTGGTGGGGCCGGTCAGAGTGAT  |
| Seq 2                                                                  | CGGTACTGTTGGTCATGGAGCTGTTGATATCTTCCTCCAGCTTGTGATGATCATAGCGAAAGCCTTAAAGATGGCATTGGTGGGGCCGGTCAGAGTGAT  |
| Ref                                                                    | GATTCTCTCCGGACAATCCCCCCTCCGAGATGTTGATCCGCGGCCACTCTCCTCGGGATCCTCTTAACCGACTCCCCTTTCTTCCCAATGATGCTTCTC  |
| Seq 1                                                                  | GATTCTCTCCGGACAATCCCCCCTCCGAGATGTTGATCCGCGGCCACTCTCCTCGGGATCCTCTTAACCGACTCCCCTTTCTTCCCAATGATGCTTCTC  |
| Seq 2                                                                  | GATTCTCTCCGGACAATCCCCCCTCCGAGATGTTGATCCGCGGCCACTCTCCTCGGGATCCTCTTAACCGACTCCCCTTTCTTCCCAATGATGCTTCTC  |
| Ref                                                                    | ACTTCCTTTCCGTGCATAAGAAGCCGAATGGTGAGAGTCACATTTAGTCCAC-TTTCAGTCACACCGGCATCCATGGCGAGCGGGCGGGCGGCTTCGGGG |
| Seq 1                                                                  | ACTTCCTTTCCGTGCATAAGAAGCCGAATGGTGAGAGTCACATTTAGTCCAC-TTTCAGTCACACCGGCATCCATGGCGAGCGGGCGGGCGGCTTCGGGG |
| Seq 2                                                                  | ACTTCCTTTCCGTGCATAAGAAGCCGAATGGTGAGAGTCACATTTAGTCCAC-TTTCAGTCACACCGGCATCCATGGCGAGCGGGCGGGCGGCTTCGGGG |
| <b>LM2-4175 ARIH1 sh8 hnRNP E1 CRISPR clone 52 product A (550 bp)</b>  |                                                                                                      |
| Ref                                                                    | TCGCGGATCTCTTTGATCTTACACCCGCCTTTCCCAATCAGGGAGCCGCACTGGGTGGCCGGCACCACCAGCCTCAGGGTGACCGGGGGCCTGCTGGCCG |
| Seq 1                                                                  | TCGCGGATCTCTTTGATCTTACACCCGCCTTTCCCAATCAGGGAGCCGCACTGGGTGGCCGGCACCACCAGCCTCAGGGTGACCGGGGGCCTGCTGGCCG |
| Seq 2                                                                  | TCGCGGATCTCTTTGATCTTACACCCGCCTTTCCCAATCAGGGAGCCGCACTGGGTGGCCGGCACCACCAGCCTCAGGGTGACCGGGGGCCTGCTGGCCG |
| Seq 3                                                                  | TCGCGGATCTCTTTGATCTTACACCCGCCTTTCCCAATCAGGGAGCCGCACTGGGTGGCCGGCACCACCAGCCTCAGGGTGACCGGGGGCCTGCTGGCCG |
| Ref                                                                    | CGGTACTGTTGGTCATGGAGCTGTTGATATCTTCC-----TC---CAGCTTGTGATGATC-----ATAGCGAAAGCCTTAAAGATGG---CA         |
| Seq 1                                                                  | CGGTGAAGTGGTGATAGAAC-----CTTCCGA---T-----TTGTCCATCATC-----TTTGCAGATGACTTAAAGAAAG---CC                |
| Seq 2                                                                  | CGGTGGCGGTGGTCAT-----TGA-ATCCTGCGAATTTGCCCTCATCTTGGCGAA-----AGACCTAA---CGAAAGCCTTG---AAGGGGACCG      |
| Seq 3                                                                  | CGGTGCTTCTGGGTATG-----TG-----TGCG---GTCA-TCATCTTGTGCGAGCTCGCCGAGAT-TAATAGCAAAACACTAGAAAATGGAA---     |
| Ref                                                                    | TTGGTGGGGC-CGGTCA---GAGTGATG---ATTCTCTCC--GGACAATCCCCCTCCG--AGATGTTGATCCGCGCGCCACTCTCCTCGGGATCCTCT   |
| Seq 1                                                                  | TTGAAGGGGA-CGGTTG---GAGGGCG---GTTCTAACC--GAAAATTTCCCG--CGAAAATGCCATCCGAAAGGTACTCCCTCCCGATCCTCT       |
| Seq 2                                                                  | TTGGAGGGG--CGGT---TCTAAGGGTG--ATTTCC--CCCTGGAAAATTTCCCTCCGAAAGCTT-----ATCCCTCCCGATCCTCT              |
| Seq 3                                                                  | -TGGGGGGATCAGTCACTTA-----TGCAATCTCTCGCC---AAATCTGTTC--ACGCTTCGGATTTCCCGCAACTCTCTCGCAATTTCTC          |
| Ref                                                                    | TAACCGACTCCCCTTTCTTCCCAATGATGCTTCC--TACTTCTTTCCGTGCAT-----AAGAGCCGAATG---GTGAGA-----G---T---         |
| Seq 1                                                                  | TAACGGACCCCTTATCTTCCCGCCCTTGTCTCC--TACTGACGTTCCCTACTT-----CCTAACCCGAATG---AAGAGA--CCAACGG---TTAA     |
| Seq 2                                                                  | TACCGGACCCCTTAAACACCCCTTTGCTTCCA--ATTCTTTCTTGTCTC-----TTAACCCGAATG---AAGAGACCCATTG---TTAA            |
| Seq 3                                                                  | TTCCGGA-----TT-----CCCGATGCTTCCAATGATGC-----CTTCGACTATAATTACCCGATTGTAAAGTGA---AATGGGGATTAA           |
| Ref                                                                    | -----CACATTTAGTCCACTTTCAGTCACACCGGCATCCATGGCGAGCGGGCGG                                               |
| Seq 1                                                                  | AA-CACTCTTTACTCCACTT-----CATCCCGCGCACCAGCGGG                                                         |
| Seq 2                                                                  | AAGCCCTTTTAA-TCCACTTCT--CCA-----C-----GGCTCCAGCGGG                                                   |
| Seq 3                                                                  | AAC-----A-TCGACA-CCTGTGACATTGGTA----GGCGT-----GGG                                                    |
| <b>LM2-4175 ARIH1 sh8 hnRNP E1 CRISPR clone 52 product B (~300 bp)</b> |                                                                                                      |
| Ref                                                                    | TCGCGGATCTCTTTGATCTTACACCCGCCTTTCCCAATCAGGGAGCCGCACTGGGTGGCCGGCACCACCAGCCTCAGGGTGACCGGGGGCCTGCTGGCCG |
| Seq1                                                                   | TCGCGGATCTCTTTGATCTTACACCCGCCTTTCCCAATCAGGGAGCCGCACTGGGTGGCCGGCACCACCAGCCTCAGGGTGACCGGGGGCCTGCTGGCCG |
| Ref                                                                    | CGGTACTGTTGGTCATGGAGCTGTTGATATCTTCCTCCAGCTTGTGATGATCATAGCGAAAGCCTTAAAGATGGCATTGGTGGGGCCGGTCAGAGTGAT  |
| Seq1                                                                   | CGGT-----                                                                                            |
| Ref                                                                    | GATTCTCTCCGGACAATCCCCCCTCCGAGATGTTGATCCGCGGCCACTCTCCTCGGGATCCTCTTAACCGACTCCCCTTTCTTCCCAATGATGCTTCTC  |
| Seq1                                                                   | -----                                                                                                |
| Ref                                                                    | ACTTCCTTTCCGTGCATAAGAAGCCGAATGGTGAGAGTCACATTTAGTCCACTTTCAGTCACACCGGCATCCATGGCGAGC                    |
| Seq1                                                                   | -----CAGTCACACCGGCATCCATGGCGAGC                                                                      |
| <b>SUM159 ARIH1 sh5 hnRNP E1 CRISPR clone 1 product A (550 bp)</b>     |                                                                                                      |
| Ref                                                                    | TCGCGGATCTCTTTGATCTTACACCCGCCTTTCCCAATCAGGGAGCCGCACTGGGTGGCCGGCACCACCAGCCTCAGGGTGACCGGGGGCCTGCTGGCCG |
| Seq1                                                                   | TCGCGGATCTCTTTGATCTTACACCCGCCTTTCCCAATCAGGGAGCCGCACTGGGTGGCCGGCACCACCAGCCTCAGGGTGACCGGGGGCCTGCTGGCCG |
| Seq2                                                                   | TCGCGGATCTCTTTGATCTTACACCCGCCTTTCCCAATCAGGGAGCCGCACTGGGTGGCCGGCACCACCAGCCTCAGGGTGACCGGGGGCCTGCTGGCCG |
| Ref                                                                    | CGGTACTGTTGGTCATGGAGCTGTTGATATCTTCCTCCAGCTTGTGATGATCATAG-CGAAAGCCTTAAAGATGGCATTGGTGGGGCCGGTCAGAGTGA  |
| Seq1                                                                   | CGGTACTGTTGGTCATGGAGCTGTTGATATCTTCCTCCAGCTTGTGATGATCATAG-CGAAAGCCTTAAAGATGGCATTGGTGGGGCCGGTCAGAGTGA  |
| Seq2                                                                   | CGGCCTTGTGGCCAGCGTCCGGCGAAATGGTGGGGCGGCTTGTGGGTACTCATAGCCGTAA-CCTGAAAGATGACATTGGTGGGGCCGGTCAGAGTGA   |
| Ref                                                                    | TGATTCTCTCCGGACAATCCCCCCTCCGAGATGTTGATCCGCGGCCACTCTCCTCGGGATCCTCTTAACCGACTCCCCTTTCTTCCCAATGATGCTTCC  |
| Seq1                                                                   | TGATTCTCTCCGGACAATCCCCCCTCCGAGATGTTGATCCGCGGCCACTCTCCTCGGGATCCTCTTAACCGACTCCCCTTTCTTCCCAATGATGCTTCC  |
| Seq2                                                                   | TGATTCTCTCCGGACAATCCCCCCTCCGAGATGTTGATCCGCGGCCACTCTCCTCGGGATCCTCTTAACCGACTCCCCTTTCTTCCCAATGATGCTTCC  |

Ref TACTTCCTTTCCGTGCATAAGAAGCCGAATGGTGAGAGTACATTTAGTC-CAC**TTTCAGTACACCCGGCATC**CATGGCGAGCGGGCGGC-GG  
Seq1 TACTTCCTTTCCGTGCATAAGAAGCCGAATGGTGAGAGTACATTTAGTC-CACTT-----GGCATCCCTGCCGCGCGGGCGGG  
Seq2 TACTTCCTTTCCGTGCATAAGAAGCCGAATGGTGAGAGTACATTTAGTCACACC---GTCACACAGGGATACATGGCGAGCGCTTGCGGG

**SUM159 ARIH1 sh5 hnRNP E1 CRISPR clone 1 product B (~300 bp)**

Ref **CGGTACTGTTGGTCATGGAG**CTGTTGATATCTTCTCCAGCTTGTGCGATGATCATAGCGAAAGCCTTAAAGATGGCATTGGTGGGGCCGGTCAGAGTGAT  
Seq1 CGGTA-----AGT---  
Seq2 CTG-----CCTCCA-----

Ref GATTCCTCCGGACAATCCCTCCGAGATGTTGATCCGCGGCCACTCTCCTCGCGGATCCTCTTAACCGACTCCCTTTCTTCCCAATGATGCTTCCT  
Seq1 -----CTCGC-----  
Seq2 -----

Ref ACTTCCTTTCCGTGCATAAGAAGCCGAATGGTGAGAGTACATTTAGTCC**ACTTTCAGTACACCCGGCATC**CATGGCGAGCGGGCGGGCGGCTTCGGGGG  
Ref -----CAGCGGC---CATGG-----GCGGTCCGGGG  
Seq2 -----ACACGGGCATCGATGGCGATCGGGGGGAGCGGGCGGGG

Ref AGTTGGGCTCGTTA  
Seq1 CGTGTCTTCGTTA  
Seq2 ACGTGGGCTCGTTA

**SUM159 ARIH1 sh5 hnRNP E1 CRISPR clone 16 product A (550 bp)**

Ref TCGCGGATCTCTTTGATCTTACACCCGCCTTTCCCAATCAGGGAGCCGCACTGGGTGGCCGGCACCACCAGCCTCAGGGTGACCGGGGGCTGCTGGCCG  
Seq1 TCGCGGATCTCTTTGATCTTACACCCGCCTTTCCCAATCAGGGAGCCGCACTGGGTGGCCGGCACCACCAGCCTCAGGGTGACCGGGGGCTGCTGGCCG  
Seq2 TCGCGGATCTCTTTGATCTTACACCCGCCTTTCCCAATCAGGGAGCCGCACTGGGTGGCCGGCACCACCAGCCTCAGGGTGACCGGGGGCTGCTGGCCG

Ref **CGGTACTGTTGGTCATGGAG**CTGTTGATATCTTCTCCAGCTTGTGCGATGATCATAGCGAAAGCCTTAAAGATGGCATTGGTGGGGCC---GGTCAGAGT  
Seq1 CGGTACTGTTGGTCATGGAGCTGTTGATATCTTCTCCAGCTTGTGCGATGATCATAGCGAAAGCCTTAAAGATGGCATTGGTGGGGCC---GGTCAGAGT  
Seq2 CGGT-----GGAGCTGGTGATGATTTGTCCAAATGTCGACGATCTTGGCGAAAATCTTAAAGAAGGCATTGGAGAGGACATTGGT---AGG

Ref GATGATTCTCTCCGGACA--ATTCCCCTCCGAGATGTTGATCCGCGGCCACTCTCCTCGCGGATCCTCTTAACCGACTCCCTTTCT--TCCCAATGAT  
Seq1 GATGATTCTCTCCGGACA--ATTCCCCTCCGAGATGTTGATCCGCGGCCACTCTCCTCGCGGATCCTCTTAACCGACTCCCTTTCT--TCCCAATGAT  
Seq2 GATGATTCTATC--GATAATATTCTCTGACAAATGCTGATCCACACGCGGATCTCCTCGCGGATCCTCTTAACGAACCTCCCTTTCTACTCCCT--AT

Ref GCTTCCTACTTCTTTCCGTGCATAAGAAGCCGAATGGTGAGAGTACATTTAGTC-CAC**TTTCAGTACACCCGGCATC**CATGGCGAGCGGGCGGGCGGC  
Seq1 GCTTCCTACTTCTTTCCGTGCATAAGAAGCCGAATGGTGAGAGTACATTTAGTC-CAC-----CGGCATCCATGGCGAGCGGGCGGGCGGC  
Seq2 CTTTCCTACTATGTTTCTTAGTATCTTAAACCGAATGGTAAGACTAACGTTGAGACTCATTTTACTC-CACCGCATCCATGGCAAGCGGGCGGGCGGC

**SUM159 ARIH1 sh5 hnRNP E1 CRISPR clone 16 product B (~300 bp)**

Ref GTACTCTCGC-GGATCTCTTTGATCTTACACCCGCCTTTCCCAATCAGGGAGCCGCACTGGGTGGCCGGCACCACCAGCCTCAGGGTGACCGGGGGCTG  
Seq1 GTACTCTCGCGGGATCTCTTTGATCTTACACCCGCCTTTCCCAATCAGGGAGCCGCACTGGGTGGCCGGCACCACCAGCCTCAGGGTGACCGGGGGCTG  
Seq2 GTACAGTCGCGTCATCTCTTTGATCTTACACCCGCCTTTCCCAATCAGGGAGTCCGCACTGGGTGGCCGGCACCACCAGCCTCAGGGTGACCGGGGGCTG

Ref CTGGCCG**CGGTACTGTTGGTCATGGAG**CTGTTGATATCTTCTCCAGCTTGTGCGATGATCATAGCGAAAGCCTTAAAGATGGCATTGGTGGGGCCGGTCA  
Seq1 ATGGCCGG-----ACCTGT-----  
Seq2 CTGGTCGCTGT-----

Ref GAGTGATGATTTCTCTCCGGACAATCCCTCCGAGATGTTGATCCGCGGCCACTCTCCTCGCGGATCCTCTTAACCGACTCCCTTTCTTCCCAATGAT  
Seq1 -----  
Seq2 -----

Ref GCTTCCTACTTCTTTCCGTGCATAAGAAGCCGAATGGTGAGAGTACATTTAGTCC**ACTTTCAGTACACCCGGCATC**CATGGCGAGCGGGCGGGCGGCT  
Seq1 -----CACACCAGCATCCATGGCGAGCGGGCGGGCGGCT  
Seq2 -----CAGGCACACCAGCATCCATGGCGAGCGGGCGGGCGGCT

Ref TCGGGGGAGTTGGGCTCGTTACGGG  
Seq1 TCGGGGGAGTTGGGCTCGTTACGTGG  
Seq2 TCGGGGGAGTTGGGCTCGTTACGTGG

**SUM159 ARIH1 sh5 hnRNP E1 CRISPR clone 20 product A (550 bp)**

Ref **CGGT-ACTGTTGGTCATG**---GAGCTGTTGATATCTTCTCCAGCTTGTGCGATGATCATAGCGAAAGCCTTAAAGATGGCATTGGTGGGGCCGGTCAGAGT  
Seq1 CGGT-ACTGTTGGTCATG---GAGCTGTTGATATCTTCTCCAGCTTGTGCGATGATCATAGCGAAAGCCTTAAAGATGGCATTGGTGGGGCCGGTCAGAGT  
Seq2 GTGTGACCGGCATCCATGGCGAGCGGAGGG---CGGCTTACGCTTGTCTATGATCATAGCGAAAGCCTTAAAGATGGCATTGGTGGGGCCGGTCAGAGT

Ref GATGATTCTCTCCGGACAATCCCTCCGAGATGTTGATCCGCGGCCACTCTCCTCGCGGATCCTCTTAACCGACTCCCTTTCTTCCCAATGATGCTT  
Seq1 GATGATTCTCTCCGGACAATCCCTCCGAGATGTTGATCCGCGGCCACTCTCCTCGCGGATCCTCTTAACCGACTCCCTTTCTTCCCAATGATGCTT  
Seq2 GATGATTCTCTCCGGACAATCCCTCCGAGATGTTGATCCGCGGCCACTCTCCTCGCGGATCCTCTTAACCGACTCCCTTTCTTCCCAATGATGCTT

Ref CCTACTTCTTTCCGTGCATAAGAAGCCGAATGGTGAGAGTACATTTAGTCC**ACTTTCAGTACACCCGGCATC**CATGGCG  
Seq1 CCTACTTCTTTCCGTGCATAAGAAGCCGAATGGTGAGAGTACATTTAGTCCACTTTCAGTACACCCGGCATCCATGGCG



Seq2 CCTACTTCCTTTCCGTGCATAAGAAGCCGAATGGTGAGAGTCACATT-----CAGTCACACCGGCATCCATGGCG

### SUM159 ARIH1 sh5 hnRNP E1 CRISPR clone 20 product B (~300 bp)

Ref TCGCGGATCTCTTTGATCTTACACCCGCCTTTCCCAATCAGGGAGCCGCACTGGGTGGCCGGCACCACCAGCCTCAGGGTGACCGGGGGCTGCTGGCCG  
Seq1 TCGCGGATCTCTTTGATCTTACACCCGCCTTTCCCAATCAGGGAGCCGCACTGGGTGGCCGGCACCACCAGCCTCAGGGTGACCGGGGGCTGCTGGCCG  
Seq2 TCGCGGATCTCTTTGATCTTACACCCGCCTTTCCCAATCAGGGAGCCGCACTGGGTGGCCGGCACCACCAGCCTCAGGGTGACCGGGGGCTGATGGTGC

Ref CGGTACTGTTGGTCATGGAGCTGTTGATATCTTCTCCAGCTTGTGCGATGATCATAGCGAAAGCCTTAAAGATGGCATTGGTGGGGCCGGTCAGAGTGAT  
Seq1 -----GTGTGA-  
Seq2 -----

Ref GATTCTCTCCGGACAATTCCCTCCGAGATGTTGATCCGCGGCCACTCTCTCGCGGATCCTCTTAACCGACTCCCCTTCTTCCCAATGATGCTTCCT  
Seq1 -----  
Seq2 -----

Ref ACTTCCTTTCCGTGCATAAGAAGCCGAATGGTGAGAGTCACATTTAGTCCA**CTTTCAGTCACACCGGCAT**CCATGGCGAGCGCGGGCGCGCTTCGGGGG  
Seq1 -----CCGGCATCCATGGCGAGCGCGGGCGCGCTTCGGGGG  
Seq2 -----GTGCGA-----CCGGAATTAATGGCGAGCGCGGGCGCGCTTCGGGGG

### SUM159 ARIH1 sh5 hnRNP E1 CRISPR clone 54 product (550 bp)

Ref TCGCGGATCTCTTTGATCTTACACCCGCCTTTCCCAATCAGGGAGCCGCACTGGGTGGCCGGCACCACCAGCCTCAGGGTGACCGGGGGCTGCTGGCCG  
Seq1 TCGCGGATCTCTTTGATCTTACACCCGCCTTTCCCAATCAGGGAGCCGCACTGGGTGGCCGGCACCACCAGCCTCAGGGTGACCGGGGGCTGCTGGCCG  
Seq2 TCGCGGATCTCTTTGATCTTACACCCGCCTTTCCCAATCAGGGAGCCGCTGCTGATTGGCAAGCACTTCCAGACTGAAGGTGAGGGGGGGCCGAGGGAT

Ref CGGTACTGT-TGGTCATGGAGCTGTTGATATCTT-----CCTCCA-GCTTGTGCGATGATCATAGCGAAAGCCTTAA-AGA-TGGCATTGGTGGGGCCG  
Seq1 CGGTACTGT-TGGTCATGGAGCTGTTGATATCTT-----CCTCCA-GCTTGTGCGATTATCATAGCGAAAGCCTTAA-AGA-TGGCATTGGTGGGGCCG  
Seq2 CAGT-CTCTCCGGACAATTACCTGCTGATATGTTGATCCGCGCTCCACTCTCTCTCAGATCCT-----CTTAACCGACTCCCCTTCTTCGGCCG

Ref GTCAGAGTGATGATTCTCTCCGGACAATTCCCTCCGAGATGTTGA--TCCGCGGCCACTCTCTCGCGGATCCTCTTAACCGACTCCCCTTCTTCC  
Seq1 GTCAGAGTGATGATTCTCTCCGGACAATTCCCTCCGAGATGTTGA--TCCGCGGCCACTCTCTCGCGGATCCTCTTAACCGACTCCCCTTCTTCC  
Seq2 G-CAGAATGATGATTCTCTTCCGACCAATTCCCTCCAAAAGT-GAGAGTCCCGC--CACTCCCCTTCCGATCCTCTTAACCGACTCCCCTTCTTCGTCG

Ref CAAT-GATGCTTCTACTTCTTTCCGTGCATAAGAAGCCGAATGGTGAGAGTCACATTTAGTCCA**C-TTTCAGTCACACCGGCAT**CCATGGCGAGCGGC  
Seq1 CAAT-GATGCTTCTACTTCTTTCCGTGCATAAGAAGCCGAATGGTGAGAGTCACATTTAGTCCAC-TTTCAGTCACACCGGCATCCATGGCGAGCGGC  
Seq2 GAATGGATGCT-CCGACTTCTTTCTGTTGATTAGAAAGCAAAGGTGAGAAGCACATTTAATCCACTTTTTCATTCCTCCCGGTTTCATTGGAAGGGGG

### SUM159 ARIH1 sh5 hnRNP E1 CRISPR clone 11 product (550 bp)

Ref TCGCGGATCTCTTTGATCTTACACCCGCCTTTCCCAATCAGGGAGCCGCACTGGGTGGCCGGCACCACCAGCCTCAGGGTGACCGGGGGCTGCTGGCCG  
Seq1 TCGCGGATCTCTTTGATCTTACACCCGCCTTTCCCAATCAGGGAGCCGCACTGGGTGGCCGGCACCACCAGCCTCAGGGTGACCGGGGGCTGCTGGCCG  
Seq2 TCGCGGATCTCTTTGATCTTACACCCGCCTTTCCCAATCAGGGAGCCGCACTGGGTGGCCGGCACCACCAGCCTCAGGGTGACCGGGGGCTGCTGGCCG

Ref CGGTACTGTTGGTCATGGAGCTGTTGATATCTTCTCCAGCTTGTGCGATGATCATAGCGAAAGCCTTAAAGATGGCATTGGTGGGGCCGGTCAGAGTGAT  
Seq1 CGGTACTGTTGGTCATGGAGCTGTTGATATCTTCTCCAGCTTGTGCGATGATCATAGCGAAAGCCTTAAAGATGGCATTGGTGGGGCCGGTCAGAGTGAT  
Seq2 CGGTACTGGTGGGCATGGAGCTGTTGATATCTTCTCCAGCTTGGCGATGATCATACGAAAGCCTTAAAGATGGGATTGGTGGGGCCGGCAGAATGAT

Ref GATTCTCTCCGGACAATTCCCTCCGAGATGTTGATCCGCGGCCACTCTCTCGCGGATCCTCTTAACCGACTCCCCTTCTTCCCAATGATGCTTCCT  
Seq1 GATTCTCTCCGGACAATTCCCTCCGAGATGTTGATCCGCGGCCACTCTCTCGCGGATCCTCTTAACCGACTCCCCTTCTTCCCAATGATGCTTCCT  
Seq2 GAATCTCTCCGGACAATTCCCTCCGAGATGTTGATCCGCGGCCACTCTCTCGCGGATCCTCTTAACCGACTCCCCTTCTTCCCAATGATGCTTCCT

Ref ACTTCCTTTCCGTGCATAAGAAGCCGAATGGTGAGAGTCACATTTAGTCCA**CTTTCAGTCACACCGGCAT**CCATGGCG  
Seq1 ACTTCCTTTCCGTGCATAAGAAGCCGAATGGTGAGAGTCACATTTAGTCCA**CTTTCAGTCACACCGGCAT**CCATGGCG  
Seq2 ACTTCCTTTCCGTGCATAAGAAGCCGAATGGTGAGAGTCACATTTAATCCACTT-CAGTCACACCGGCATCCATGGCG

### SUM159 ARIH1 sh5 hnRNP E1 CRISPR clone 37 product (550 bp)

Ref TCGCGGATCTCTTTGATCTTACACCCGCCTTTCCCAATCAGGGAGCCGCACTGGGTGGCCGGCACCACCAGCCTCAGGGTGACCGGGGGCTGCTGGCCG  
Seq1 TCGCGGATCTCTTTGATCTTACACCCGCCTTTCCCAATCAGGGAGCCGCACTGGGTGGCCGGCACCACCAGCCTCAGGGTGACCGGGGGCTGCTGGCCG  
Seq2 TCGCGGATCTCTTTGATCTTACACCCGCCTTTCCCAATCAGGGAGCCGCACTGGGTGGCCGGCACCACCAGCCTCAGGGTGACCGGGGGCTGCTGGCCG

Ref CGGTACTGTTGGTCATGGAGCTGTTGATATCTTCTCCAGCTTGTGCGATGATCATAGCGAAAGCCTTAAAGATGGCATTGGTGGGGCCGGTCAGAGTGAT  
Seq1 CGGTACTGTTGGTCATGGAGCTGTTGATATCTTCTCCAGCTTGTGCGATGATCATAGCGAAAGCCTTAAAGATGGCATTGGTGGGGCCGGTCAGAGTGAT  
Seq2 CGGTACTGTTGGTCATGGAGCTGTTGATATCTTCTCCAGCTTGTGCGATGATCATAGCGAAAGCCTTAAAGATGGCATTGGTGGGGCCGGTCAGAGTGAT

Ref GATTCTCTCCGGACAATTCCCTCCGAGATGTTGATCCGCGGCCACTCTCTCGCGGATCCTCTTAACCGACTCCCCTTCTTCCCAATGATGCTTCCT  
Seq1 GATTCTCTCCGGACAATTCCCTCCGAGATGTTGATCCGCGGCCACTCTCTCGCGGATCCTCTTAACCGACTCCCCTTCTTCCCAATGATGCTTCCT  
Seq2 GATTCTCTCCGGACAATTCCCTCCGAGATGTTGATCCGCGGCCACTCTCTCGCGGATCCTCTTAACCGACTCCCCTTCTTCCCAATGATGCTTCCT

Ref ACTTCCTTTCCGTGCATAAGAAGCCGAATGGTGAGAGTCACATTTAGTCCA**CTTTCAGTCACACCGGCAT**CCATGGCG  
Seq1 ACTTCCTTTCCGTGCATAAGAAGCCGAATGGTGAGAGTCACATTTAGTCCA**CTTTCAGTCACACCGGCAT**CCATGGCG  
Seq2 ACTTCCTTTCCGTGCATAAGAAGCCGAATGGTGAGAGTCACATTTAGTCCA**CTTTCAGTCACACCGGCAT**CCATGGCG
